# Supplementary material
Source: Springer Nature journal article supplement (https://www.springermedizin.de/resource/supplementary/12937_2007_160_MOESM3_ESM.pdf/25654526)

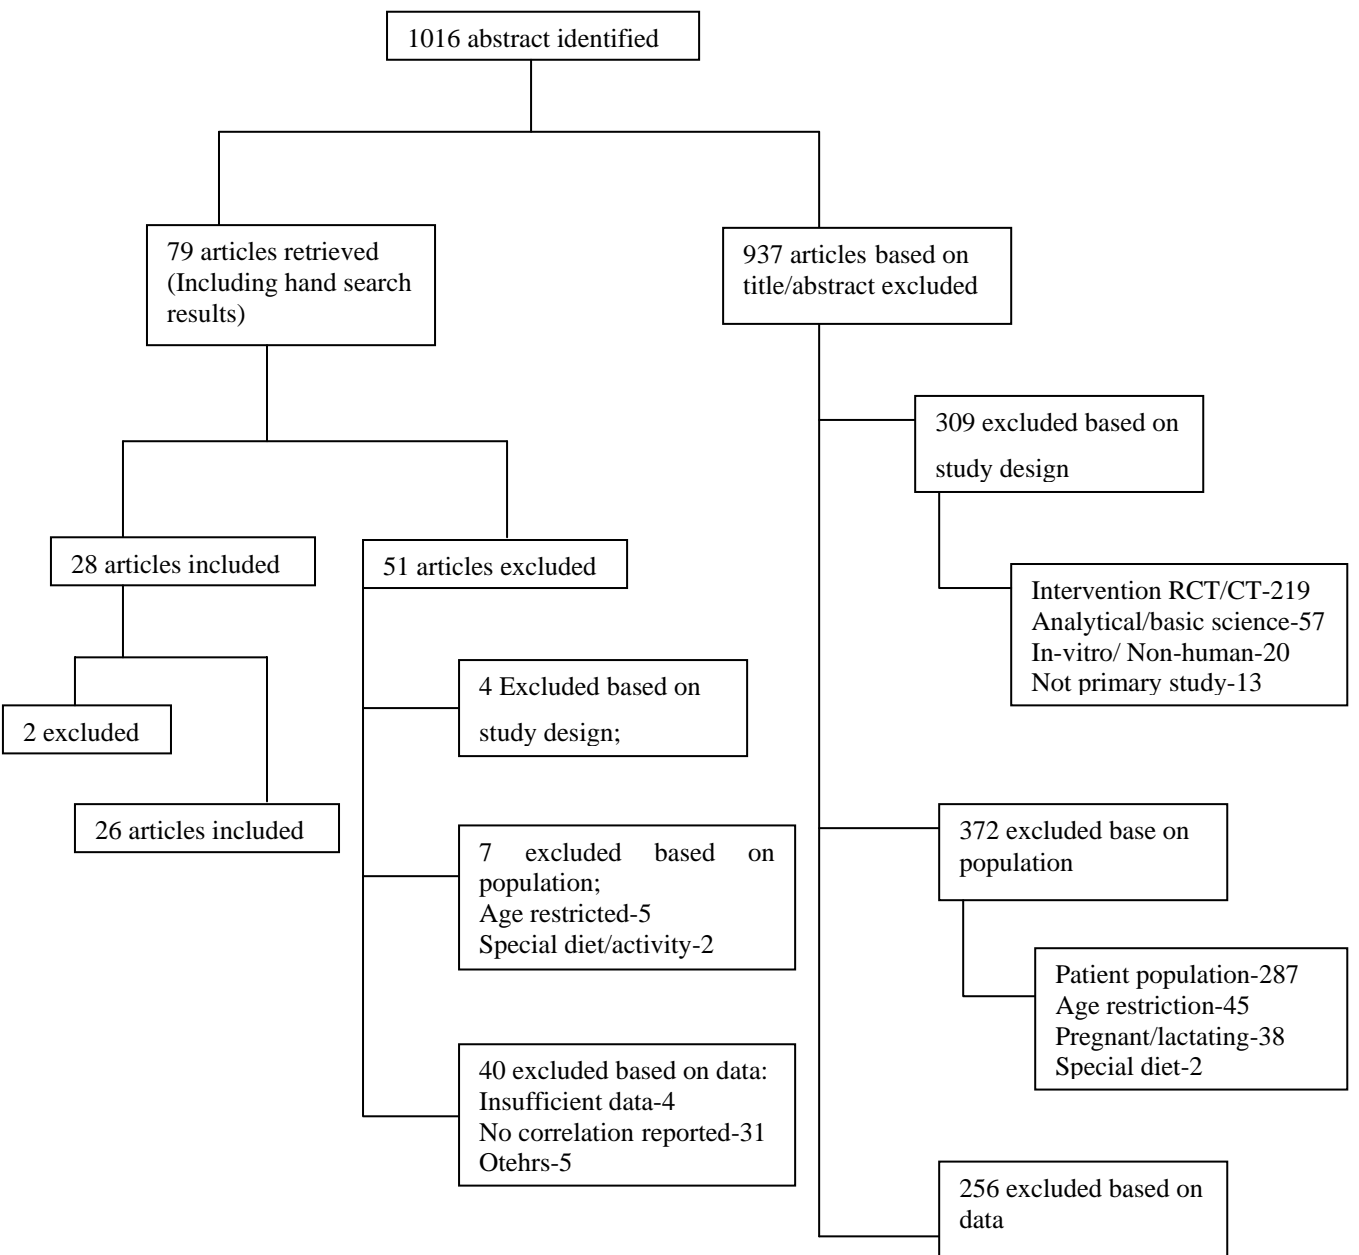

Supplement: MOESM3 [file 25654526]
